# Supplementary material for: MELTF-AS1 Regulates DUSP5 and Trophoblast Function via EZH2 to Inhibit Preeclampsia
Source: Research Square preprint supplement (doi:10.21203/rs.3.rs-8076487/v1), 2026-01-21
Supplement: Supplementary file 1 [file cf283a65bda3826dedfa3273.docx]

**Table S1. The list of PCR/ChIP-PCR primers and siRNAs sequences.**

| **Real-time PCR primer sequences (human)** | | |
| --- | --- | --- |
| **Gene** | **Forward Primer** | **Reverse Primer** |
| GAPDH | 5’- CTTTGTCAAGCTCATTTCCTGG -3' | 5’- TCTTCCTCTTGTGCTCTTGC -3' |
| MELTF-AS1 | 5’- CCGCTAGCTGCAAATTGCTT -3' | 5’- TTGGGTGACAGAGGCCAATC -3 |
| DUSP5 | 5’- CCTGAGTGTTGCGTGGATGT -3' | 5’- CCTGAGTGTTGCGTGGATGT -3' |
| U6 | 5'-CTCGCTTCGGCAGCACA -3' | 5'- AACGCTTCACGAATTTGCGT -3' |
|  | | |
| **CHIP-QPCR primer sequences (human)** | | |
| MELTF-AS1 CHIP -1 | 5’- CAAAACAGCACAAGGCCCTC -3' | 5’- GGCCAACTCCGAGGAATGAA -3' |
| MELTF-AS1 CHIP -2 | 5’- TGGGTGGATGCATCTGTGAC -3' | 5’- ATTGTTAGCCTGGCTGGGAC -3' |
| MELTF-AS1 CHIP -3 | 5’- TTTCCATCCATGTGTCCCCG -3' | 5’- AGGTGGCTTCTGGATTTGGG -3' |
|  | | |
| **MELTF-AS1 siRNA sequence (human)** | | |
| 1# sense 5’-CCGCUAGCUGCAAAUUGCUUUACAU -3’, antisense 5’- AUGUAAAGCAAUUUGCAGCUAGCGG -3’ | | |
|  | | |

**Table S2. Related antibody information and description.**

| **Muscle** | **Blocking RT 1h** | **1st Ab 4°C O/N** | **1st Ab dilution** | **1st Ab Vendor** | **2nd Ab RT 2h** | **2nd Ab dilution** | **2nd Ab Vendor** | **Transfer on ice** | **Wash** |
| --- | --- | --- | --- | --- | --- | --- | --- | --- | --- |
| DUSP5 | 5% nonfat milk | 5% BSA | 1:500 | Proteintech #30256-1-AP | 5% BSA | Anti-Rabbit IgG,1:20000 | PROTEINTECH SA00001-2 | 0.45um 400mA, 60min | Wash 3 times after 1st and 2nd Abs, 5 min each time |
| GAPDH | 5% nonfat milk | 5% BSA | 1:1000 | Proteintech #10494-1-AP | 5% BSA | Anti-Rabbit IgG,1:20000 | PROTEINTECH SA00001-2 | 0.45um 200mA, 60min | Wash 3 times after 1st and 2nd Abs, 5 min each time |

**File S3: Uncut original western membrane imagines.**

**Figure2E**


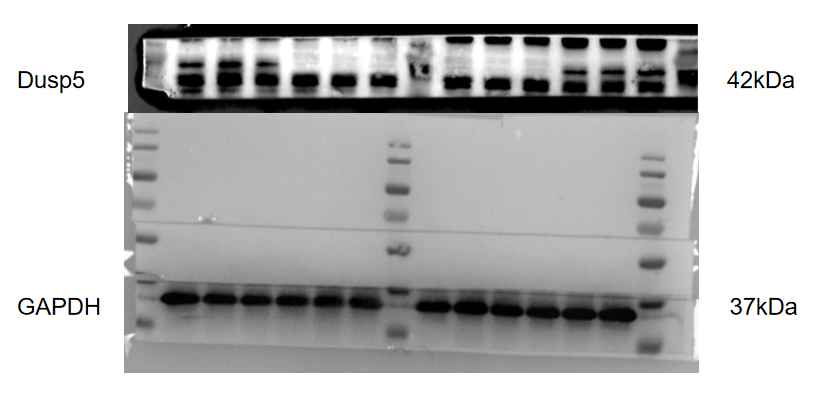


**Figure3D**


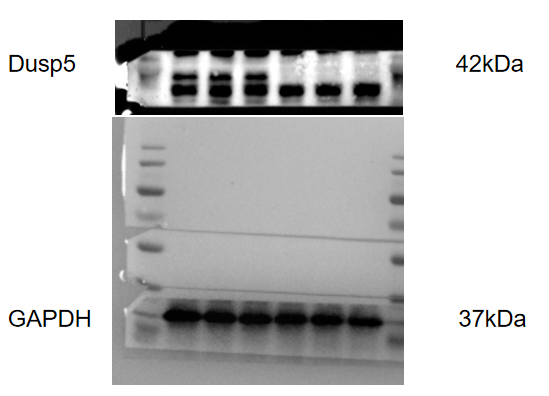


**Figure3F**


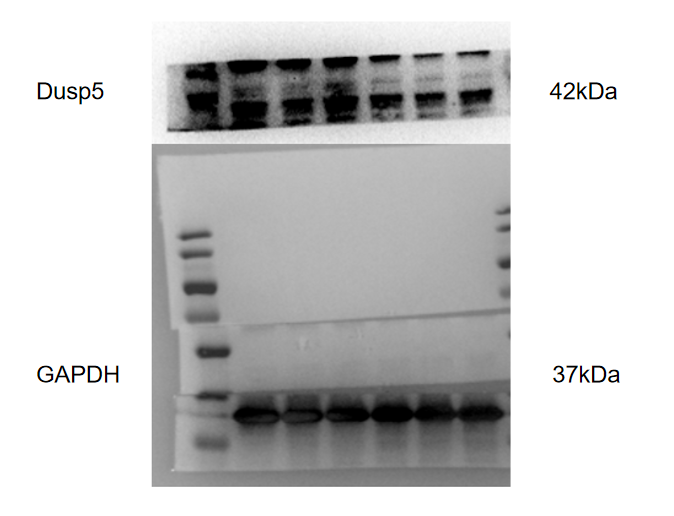


| **Table S4. Clinical characteristics of Patients with PE and Normal Pregnancies.** | | | |
| --- | --- | --- | --- |
| Variable | PE(n=3) | Control(n=3) | *p* Value (PE versus Control) |
| Maternal age(year) | 30.19±5.003 | 29.97±5.357 | *p*﹥0.05 |
| Maternal weight(kg) | 74.87±11.531 | 73.49±8.135 | *p*﹥0.05 |
| Systolic blood pressure(mmHg) | 149.43±16.451 | 126±8.529 | *p*﹤0.01 |
| Diastolic blood pressure(mmHg) | 101.34±10.869 | 74.33±8.445 | *p*﹤0.05 |
| Gestational week(wk) | 35.57±4.381 | 38.41±1.421 | *p*﹤0.01 |
| Body weight of infant(g) | 2169.57±762.698 | 3065.07±377.707 | *p*﹤0.01 |
